# Supplementary material for: A size-tunable nanoplatform: enhanced MMP2-activated chemo-photodynamic immunotherapy based on biodegradable mesoporous silica nanoparticles
Source: Royal Society of Chemistry journal article supplement (doi:10.1039/d0bm01452d), 2020-11-26
Supplement: d0bm01452d1.pdf [file d0bm01452d1.pdf]

## Supporting Information

### A size-tunable nanoplatform: enhanced MMP2-activated chemo-photodynamic immunotherapy based on biodegradable mesoporous silica nanoparticles

Ye Chen<sup>b</sup>, He Ma<sup>a</sup>, Wenli Wang<sup>a</sup>, Min Zhang<sup>\*,a</sup>

<sup>a</sup> Institute of Biomedical Materials and Engineering, College of Materials Sciences and Engineering, Qingdao University, Qingdao 266071, China

<sup>b</sup> Department of Pharmacy, Affiliated Qingdao Hiser Hospital of Qingdao University, Qingdao 266033, China

\*Correspondence should be addressed to:

Institute of Biomedical Materials and Engineering

College of Materials Sciences and Engineering

Qingdao University, Qingdao 266071, China

E-mail: zhangmin\_xyz@163.com

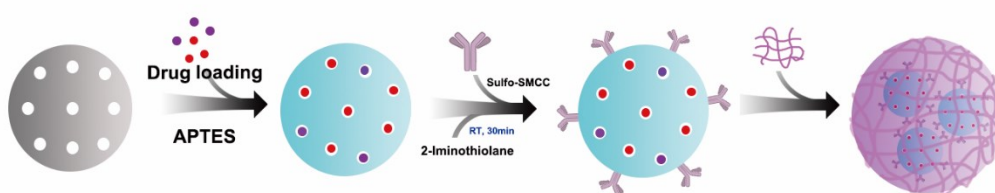

**Fig. S1.** General process of the basic steps in synthesizing Ce6/PTX@PSN-Gel.

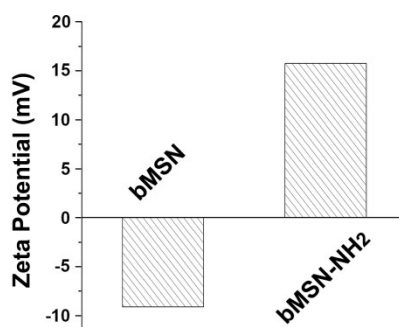

**Fig. S2.** Surface zeta potential of bMSN and bMSN-NH<sub>2</sub>.

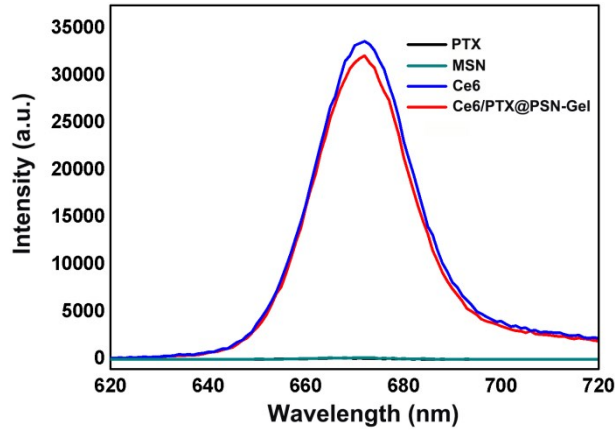

**Fig. S3.** Fluorescence emission spectra of PTX, MSN, Ce6 and Ce6/PTX@PSN-Gel.

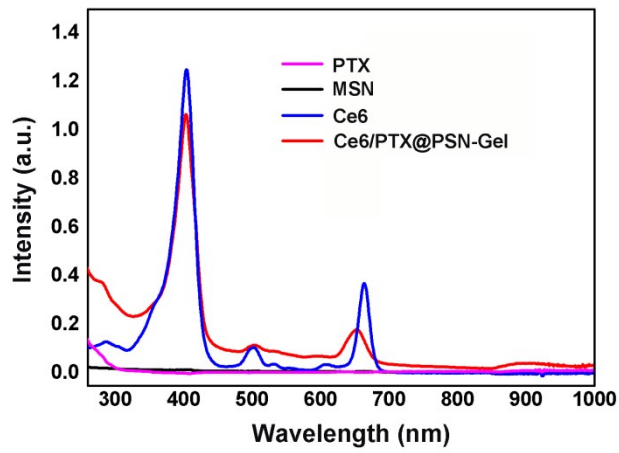

**Fig. S4.** Absorption spectra of PTX, MSN, Ce6 and Ce6/PTX@PSN-Gel.

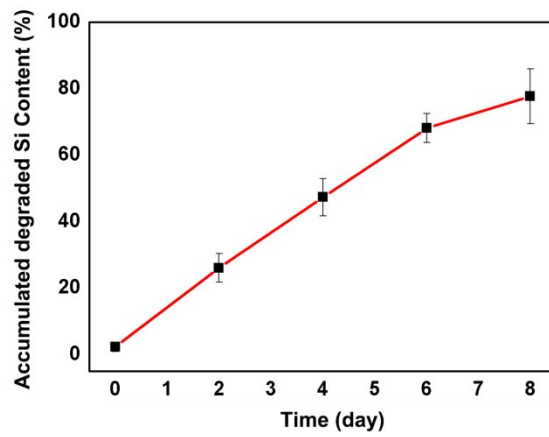

**Fig. S5.** *In vitro* biodegradation profile of bMSN.

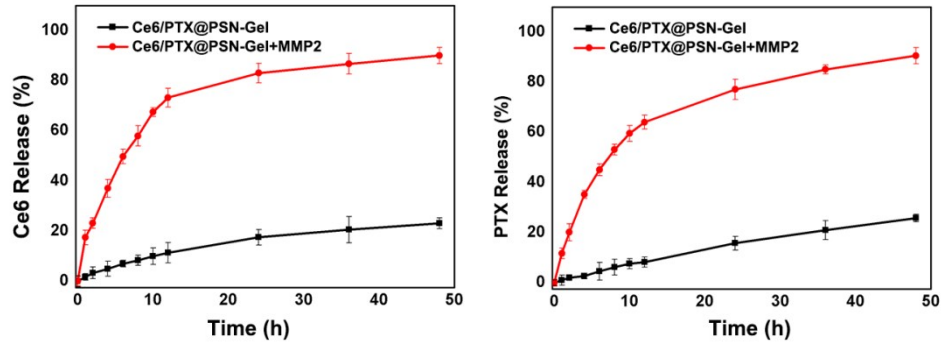

**Fig. S6.** Drug release profile of Ce6/PTX@PSN-Gel.

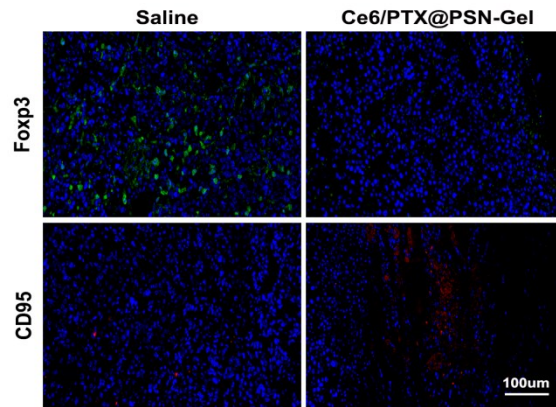

**Fig. S7.** Foxp3 and CD95 staining of the tumor sections after treated with saline and Ce6/PTX@PSN-Gel (green: anti-Foxp3/FITC; red: anti-CD95/PE; blue: DAPI).

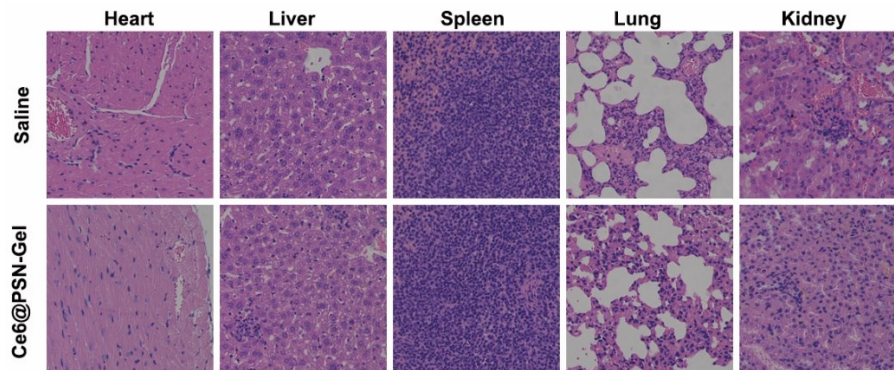

**Fig. S8.** H&E staining of main organs after treated with saline and Ce6/PTX@PSN-Gel.
